# Supplementary material for: Multivariate Analysis of Dopaminergic Gene Variants as Risk Factors of Heroin Dependence
Source: PLoS One. 2013 Jun 28;8(6):e66592. doi: 10.1371/journal.pone.0066592 (PMC3696122; doi:10.1371/journal.pone.0066592)
Supplement: Table S2 — Haplotype frequencies of the Taq SNPs in the DRD2 gene. (XLS) [file pone.0066592.s003.xls]

## Sheet: Munka1
Table S2. Haplotype frequencies of the Taq SNPs in the DRD2 gene.
Markers	Haplotypes	Control	Case	Likelihood ratio	df	p-value
TaqIA - TaqID	C ~ C	0.248	0.2382	6.59271	3	0.086
	C ~ T	0.5694	0.5248
	T ~ C	0.1472	0.1921
	T ~ T	0.03537	0.04486
TaqIA - TaqIB	C ~ A	0.001	0.0037	12.3536	3	0.0063
	C ~ G	0.8294	0.7579
	T ~ A	0.1382	0.1991
	T ~ G	0.0314	0.03929
TaqID - TaqIB	C ~ A	0.1502	0.2011	10.6762	3	0.0136
	C ~ G	0.2458	0.2311
	T ~ A	0	0.0046
	T ~ G	0.604	0.5622
TaqIA - TaqID - TaqIB	C ~ C ~ A	0.0011	0.00375	14.135	6	0.028
	C ~ C ~ G	0.2435	0.232
	C ~ T ~ G	0.5762	0.5223
	T ~ C ~ A	0.147	0.1974
	T ~ C ~ G	0.0022	0
	T ~ T ~ A	0	0.004609
	T ~ T ~ G	0.03	0.03985
